# Supplementary material for: Dysbiosis of Gut Microbiota Promotes Hepatocellular Carcinoma Progression by Regulating the Immune Response
Source: Hindawi journal article supplement (doi:10.1155/2021/4973589), 2021-10-20
Supplement: f1 [file 4973589.f1.pdf]

**Supplementary Table 1. Detailed information of study subjects**

| Lab number | Gender | Age | Group        | Etiological classification | Record Number | Collection data | GM-CSF (pg/mL) | ICAM-1 (pg/mL) | IFN-gamma (pg/mL) | IFN-alpha (pg/mL) | IL-1alpha (pg/mL) | IL-1beta (pg/mL) | IL-10 (pg/mL) | IL-12p70 (pg/mL) | IL-13 (pg/mL) | IL-17A (pg/mL) | IL-4 (pg/mL) | IL-8 (pg/mL) | IP-10 (pg/mL) |
|------------|--------|-----|--------------|----------------------------|---------------|-----------------|----------------|----------------|-------------------|-------------------|-------------------|------------------|---------------|------------------|---------------|----------------|--------------|--------------|---------------|
| HCE1       | male   | 55  | early        | HCV                        | 298636        | 20180318        | 11.8           | 8E+05          | 19.55             | 1.42              | 3.62              | 2.32             | 1.58          | 22.36            | 23.65         | 11.31          | 24.4         | 107.77       | 191.72        |
| HCP2       | male   | 59  | terminal     | HCV                        | 298866        | 20180408        | 19.79          | 2E+05          | 12.08             | 1.26              | 1.02              | 2.67             | 2.54          | 21.35            | 17.81         | 10.09          | 17.86        | 8.88         | 72.33         |
| HCP3       | male   | 70  | intermediate | HCV                        | 299738        | 20180407        | 73.9           | 2E+05          | 27.06             | 2.98              | 1.95              | 7.47             | 4.68          | 41.87            | 50.96         | 21.2           | 32.66        | 6.7          | 57.43         |
| HCE4       | male   | 62  | early        | HCV                        | 299484        | 20180427        | 59.23          | 46616          | 21.88             | 2.65              | 1.64              | 5.12             | 3.9           | 34.61            | 37.86         | 17.6           | 24.24        | 7.26         | 44.37         |
| HCL8       | male   | 48  | intermediate | HBV                        | 300427        | 20180427        | 80.04          | 6E+05          | 30.7              | 4.54              | 1.93              | 7.09             | 6.63          | 48.14            | 47.38         | 28.02          | 28.03        | 9.73         | 38.71         |
| HCP10      | male   | 59  | intermediate | HCV                        | 300404        | 20180513        | 50.88          | 3E+05          | 21.88             | 3.03              | 1.8               | 6.37             | 7.03          | 38.06            | 38.3          | 19.32          | 30.6         | 6.51         | 71.64         |
| HCL14      | male   | 70  | terminal     | HCV                        | 299668        | 20180518        | <=0            | 1E+06          | 17.74             | 1.03              | 0.51              | 2.01             | 1.77          | 21.85            | 30.14         | 15.09          | 17.33        | 5.52         | 64.3          |
| HCE15      | male   | 56  | early        | HBV                        | 301034        | 20180518        | 14.01          | 2E+05          | 15.17             | 1.42              | 0.61              | 1.56             | 1             | 22.52            | 19.34         | 15.28          | 13.66        | 6.89         | 90.18         |
| HCM19      | male   | 69  | terminal     | HBV                        | 301130        | 20180523        | <=0            | 4E+05          | 5.7               | 0.04              | 1.21              | 1.11             | 0.91          | 12.05            | 35.83         | 5.86           | 3.36         | 6.23         | 45.43         |
| HCE37      | male   | 71  | early        | HCV                        | 302108        | 20180622        | 38.69          | 2E+05          | 17.48             | 4.09              | 0.59              | 5.04             | 2.06          | 21.35            | 40.27         | 25.84          | 36.56        | 11.15        | 75.2          |
| HCP39      | male   | 68  | intermediate | HCV                        | 271886        | 20180623        | 44.71          | 65069          | 14.39             | 2.73              | 2.01              | 6.62             | 3.7           | 37.02            | 35.14         | 19.32          | 21.7         | 4.45         | 33.31         |
| HCP40      | male   | 63  | intermediate | HCV                        | 297857        | 20180627        | 24.79          | 4E+05          | 9.27              | 1.21              | 1.49              | 2.47             | 10.38         | 19               | 18.73         | 11.51          | 27.05        | 25.83        | 173.27        |
| HCP41      | male   | 62  | intermediate | HCV                        | 301645        | 20180627        | <=0            | 8E+05          | 7.35              | 0.36              | 5.76              | 0.83             | 2.35          | 13.03            | 2.38          | 7.38           | 9.16         | 41.66        | 126.34        |
| HCP44      | male   | 69  | intermediate | HCV                        | 297948        | 20180628        | 27.85          | 99679          | 10.03             | 9.15              | 0.96              | 3.3              | 2.49          | 20.67            | 22.82         | 12.72          | 16.79        | 4.45         | 60.17         |
| HCM45      | male   | 59  | early        | HBV                        | 298989        | 20180707        | 9.34           | 7E+05          | 9.52              | 1.99              | 1                 | 2.55             | 2.73          | 14.02            | 18.73         | 8.85           | 21.87        | 22.31        | 245.67        |
| HCP49      | male   | 61  | intermediate | HCV                        | 300648        | 20180630        | 16.06          | 3E+05          | 21.62             | 2.48              | 1.78              | 3.7              | 1.15          | 27.94            | 23.92         | 16.06          | 24.07        | 68.41        | 77.56         |
| HCP50      | male   | 59  | intermediate | HCV                        | 301861        | 20180703        | NA             | NA             | NA                | NA                | NA                | NA               | NA            | NA               | NA            | NA             | NA           | NA           | NA            |
| HCM59      | male   | 55  | intermediate | HCV                        | 300264        | 20180713        | 6.48           | 5E+05          | 14.91             | 1.88              | 0.71              | 2.39             | 1.39          | 18               | 19.94         | 14.3           | 15.7         | 10.26        | 39.91         |
| HCE63      | male   | 34  | early        | HBV                        | 302770        | 20180708        | <=0            | 8E+05          | 9.27              | 1.03              | 1.93              | 1.71             | 1.96          | 12.21            | 14.19         | 11.11          | 8.33         | 46.61        | 78.94         |
| HCM65      | male   | 60  | intermediate | HBV                        | 2E+08         | 20180708        | 9.34           | 3E+05          | 11.57             | 1.26              | 0.55              | 2.47             | 1.1           | 19.33            | 19.94         | 11.41          | 13.09        | 3.25         | 35.5          |
| HCE66      | male   | 65  | intermediate | HBV                        | 302838        | 20180713        | NA             | NA             | NA                | NA                | NA                | NA               | NA            | NA               | NA            | NA             | NA           | NA           | NA            |
| HCL67      | male   | 75  | terminal     | HCV                        | 290857        | 20180714        | 26.34          | 6E+05          | 12.08             | 1.21              | 2.79              | 2.86             | 6.58          | 17               | 22.25         | 14.01          | 19.63        | 67.7         | 113.95        |
| HCM70      | male   | 53  | intermediate | HCV                        | 291578        | 20180714        | 50.34          | 98114          | 20.97             | 3.15              | 1.91              | 6.04             | 3.51          | 38.4             | 37.63         | 18.37          | 28.03        | 4.29         | 38.64         |
| HCE71      | male   | 68  | early        | HCV                        | 289084        | 20180713        | 17.97          | 1E+06          | 18.78             | 2.56              | 0.91              | 3.9              | 2.73          | 29.82            | 28.14         | 19.79          | 21.53        | 4.08         | 13.77         |
| HCE76      | male   | 44  | early        | HBV                        | 276904        | 20180721        | 112.9          | 2E+05          | 38.79             | 7.42              | 3.22              | 15.9             | 11.52         | 82.99            | 62.55         | 38.62          | 43.22        | 9.69         | 34.97         |
| HCP120     | male   | 59  | terminal     | HCV                        | 303822        | 20180928        | 70.27          | 5E+05          | 42.19             | 3.25              | 1.96              | 6.88             | 4.29          | 38.92            | 36.28         | 22.14          | 35.94        | 17.59        | 71.7          |
| HCL122     | male   | 59  | terminal     | HCV                        | 301861        | 20180922        | 52.5           | 5E+05          | 19.29             | 2.09              | 1.47              | 4.1              | 3.51          | 25.73            | 26.07         | 15.38          | 22.72        | 18.84        | 43.66         |
| HCM125     | male   | 68  | intermediate | HBV                        | 253272        | 20181110        | 45.86          | 5E+05          | 19.42             | 2.92              | 1.11              | 4.63             | 3.46          | 33.93            | 32.56         | 19.51          | 17.68        | 5.06         | 36.76         |
| HCM127     | male   | 63  | intermediate | HCV                        | 297857        | 20181024        | NA             | NA             | NA                | NA                | NA                | NA               | NA            | NA               | NA            | NA             | NA           | NA           | NA            |
| HCE128     | male   | 66  | early        | HCV                        | 298535        | 20181107        | 37.43          | 6E+05          | 21.1              | 1.79              | 1.22              | 3.82             | 1.58          | 27.94            | 27.37         | 15.48          | 24.57        | 7.59         | 52.47         |
| HCEE129    | male   | 54  | early        | HBV                        | 304337        | 20180829        | 6.48           | 1E+05          | 6.97              | 1.19              | 0.52              | 1.67             | 1.72          | 16.83            | 17.18         | 8.01           | 9.56         | 3.34         | 42.3          |
| HCP130     | male   | 61  | early        | HBV                        | 228639        | 20181031        | 9.34           | 3E+05          | 8.88              | 0.7               | 0.59              | 1.71             | 1.1           | 11.72            | 13.84         | 8.64           | 7.49         | 5.17         | 25.85         |

|         |      |    |              |     |        |            |       |       |       |      |      |      |       |       |       |       |       |       |        |
|---------|------|----|--------------|-----|--------|------------|-------|-------|-------|------|------|------|-------|-------|-------|-------|-------|-------|--------|
| HCM130  | male | 61 | intermediate | HBV | 228639 | 2018/6/12  | <=0   | 4E+05 | 10.67 | 0.89 | 1.19 | 1.86 | 1.48  | 13.52 | 13.49 | 11.11 | 10.37 | 3.52  | 57.73  |
| HCP131  | male | 45 | terminal     | HBV | 305430 | 20181009   | 24    | 3E+05 | 9.27  | 1.73 | 2.15 | 3.34 | 2.93  | 23.37 | 19.04 | 13.12 | 19.97 | 10.05 | 79.53  |
| HCM132  | male | 58 | intermediate | HCV | 298803 | 20181205   | 115.8 | 4E+05 | 45.59 | 7.88 | 3.38 | 17.4 | 13.11 | 81.54 | 74.47 | 42.19 | 49.7  | 8.71  | 38.2   |
| HCM133  | male | 51 | intermediate | HBV | 221697 | 20181223   | 115.1 | 1E+05 | 50.84 | 8.96 | 4.34 | 20.2 | 12.91 | 104.6 | 85.02 | 46.24 | 52.3  | 8.31  | 28.76  |
| HCL137  | male | 59 | terminal     | HBV | 235895 | 20181212   | 87.61 | 1E+05 | 29.27 | 4.38 | 2.07 | 8.41 | 6.83  | 38.4  | 47.38 | 25.01 | 30.28 | 6.11  | 24.66  |
| HCM139  | male | 51 | intermediate | HBV | 281741 | 20181102   | 26.34 | 5E+05 | 26.8  | 3.56 | 1.35 | 4.3  | 2.59  | 35.3  | 28.64 | 21.95 | 18.57 | 7.48  | 44.19  |
| HCM140  | male | 63 | intermediate | HCV | 299484 | 20181205   | 39.31 | 50703 | 13.62 | 2.2  | 1.37 | 4.02 | 2.83  | 26.75 | 31.12 | 13.91 | 19.28 | 5.92  | 49.53  |
| HCEE141 | male | 34 | early        | HBV | 302770 | 20180902   | NA    | NA    | NA    | NA   | NA   | NA   | NA    | NA    | NA    | NA    | NA    | NA    | NA     |
| HCL143  | male | 53 | terminal     | HBV | 265453 | 20180119   | 2.65  | 8E+05 | 11.06 | 0.96 | 1.04 | 2.12 | 2.01  | 18    | 14.19 | 8.22  | 14.22 | 30.28 | 38.56  |
| HCL145  | male | 68 | terminal     | HCV | 250134 | 20180829   | 6.48  | 2E+05 | 10.54 | 0.94 | 0.62 | 1.26 | 1     | 13.36 | 13.49 | 9.89  | 6.18  | 16.36 | 26.57  |
| HCM147  | male | 61 | intermediate | HCV | 298645 | 20181128   | 30.74 | 2E+05 | 16.97 | 1.64 | 1.13 | 2.39 | 2.06  | 19.17 | 22.54 | 13.91 | 16.43 | 15.14 | 68.16  |
| HCE148  | male | 66 | intermediate | HBV | 243943 | 20181013   | 60.23 | 63096 | 19.55 | 2.27 | 1.54 | 5.16 | 5.16  | 32.9  | 33.98 | 17.22 | 24.74 | 5.71  | 31.41  |
| HCM149  | male | 52 | intermediate | HBV | 305233 | 20180928   | 34.83 | 3E+05 | 12.85 | 1.28 | 1.08 | 3.74 | 3.02  | 26.07 | 22.25 | 13.71 | 11.94 | 13.8  | 27.17  |
| HCM149  | male | 52 | intermediate | HBV | 305233 | 2018/10/9  | NA    | NA    | NA    | NA   | NA   | NA   | NA    | NA    | NA    | NA    | NA    | NA    | NA     |
| HCE150  | male | 65 | early        | HBV | 304052 | 20180928   | 107.1 | 2E+05 | 45.59 | 9.69 | 3.51 | 16.2 | 13.86 | 80.46 | 77.94 | 38    | 45.3  | 12.23 | 54.4   |
| HCM155  | male | 52 | intermediate | HBV | 276959 | 2018/3/1   | <=0   | 2E+05 | 6.21  | <=0  | 0.45 | 1.19 | 2.25  | 7.5   | 7.5   | 4.3   | 6.18  | 4.36  | 64.13  |
| HCM160  | male | 51 | intermediate | HCV | 265809 | 2018/7/7   | 44.71 | 2E+05 | 28.49 | 3.69 | 2.14 | 7.09 | 2.83  | 45.35 | 43.47 | 23.72 | 28.03 | 8.73  | 73.62  |
| HCP162  | male | 42 | terminal     | HBV | 310232 | 2018/3/22  | 34.17 | 2E+05 | 14.91 | 1.75 | 2.25 | 3.74 | 4.48  | 27.26 | 32.08 | 14.69 | 24.07 | 61.6  | 83.26  |
| HCE168  | male | 53 | early        | HCV | 299915 | 2018/6/16  | 30.74 | 1E+05 | 18.13 | 2.01 | 0.83 | 3.42 | 2.54  | 26.41 | 26.07 | 17.12 | 21.01 | 3.99  | 76.77  |
| HCM170  | male | 64 | intermediate | HBV | 245472 | 2018/12/23 | 10.61 | 4E+05 | 8.75  | 0.26 | 1.05 | 1.41 | 1.39  | 17    | 9.68  | 9.06  | 9.56  | 11.51 | 71.04  |
| HCM170  | male | 64 | intermediate | HBV | 245472 | 2018/4/13  | 2.65  | 3E+05 | 4.94  | <=0  | 0.63 | 0.97 | 0.53  | 11.55 | 0.23  | 5.75  | 6.62  | 6.89  | 45.22  |
| HCP170  | male | 64 | terminal     | HBV | 245472 | 2018/9/23  | 9.34  | 4E+05 | 6.21  | 0.18 | 1.05 | 1.59 | 1.15  | 14.02 | 8.84  | 6.95  | 7.49  | 12.47 | 45.47  |
| HCP172  | male | 44 | terminal     | HBV | 307902 | 2018/1/6   | 16.06 | 7E+05 | 13.11 | 1.57 | 1.63 | 2.24 | 2.06  | 16    | 22.25 | 13.22 | 15.7  | 31.75 | 109.69 |
| HCM173  | male | 37 | intermediate | HCV | 278285 | 2018/5/10  | 17.03 | 46981 | 10.67 | 0.61 | 0.66 | 1.86 | 1.67  | 13.69 | 16.53 | 9.06  | 13.85 | 5.66  | 66.6   |
| HCP181  | male | 47 | terminal     | HBV | 308250 | 2018/5/9   | 37.43 | 2E+05 | 22.39 | 2.48 | 1.66 | 4.75 | 3.41  | 29.82 | 29.15 | 16.93 | 27.7  | 17.74 | 42.44  |
| HCM182  | male | 55 | intermediate | HBV | 258618 | 2018/3/25  | 41.15 | 2E+05 | 20.33 | 2.94 | 1.35 | 5.54 | 3.02  | 32.21 | 31.12 | 18.18 | 25.9  | 4.06  | 30.52  |
| HCM187  | male | 54 | intermediate | HBV | 242349 | 2018/4/20  | 2.65  | 2E+05 | 9.78  | 0.68 | 0.59 | 1.71 | 1.2   | 15.84 | 17.81 | 3.14  | 11.16 | 5.57  | 55.46  |
| HCEE198 | male | 61 | early        | HCV | 301281 | 2018/1/6   | 10.61 | 54712 | 7.86  | 1.03 | 0.67 | 2.98 | 1.77  | 18.67 | 14.88 | 12.32 | 8.54  | 3.18  | 28.84  |
| HCM199  | male | 54 | intermediate | HCV | 311202 | 2018/5/4   | 37.43 | 2E+05 | 33.57 | 4.86 | 0.63 | 6.5  | 1.87  | 42.22 | 39.4  | 25.19 | 40.22 | 3.13  | 45.29  |
| HCM200  | male | 55 | intermediate | HCV | 302388 | 2018/4/14  | 95.64 | 64331 | 27.19 | 3.67 | 1.94 | 7.73 | 7.67  | 38.4  | 51.35 | 22.7  | 33.45 | 5.87  | 30.36  |
| HCM202  | male | 57 | intermediate | HBV | 311206 | 2018/5/3   | 24.79 | 3E+05 | 16.58 | 0.85 | 1.45 | 2.32 | 2.83  | 20.34 | 24.47 | 11.51 | 14.22 | 19.51 | 80.61  |
| HCM205  | male | 60 | intermediate | HBV | 241432 | 2018/9/6   | 37.43 | 1E+05 | 18.78 | 2.56 | 1.23 | 4.06 | 2.06  | 28.79 | 27.88 | 16.45 | 21.53 | 14.07 | 62.22  |
| HCL206  | male | 62 | terminal     | HCV | 256724 | 2018/11/14 | <=0   | 3E+05 | 8.75  | 0.7  | 0.51 | 1.41 | 0.62  | 16.67 | 13.84 | 9.47  | 13.66 | 7.15  | 60.1   |
| HCL207  | male | 63 | terminal     | HCV | 301645 | 2018/5/9   | NA    | NA    | NA    | NA   | NA   | NA   | NA    | NA    | NA    | NA    | NA    | NA    | NA     |
| HCM214  | male | 59 | intermediate | HBV | 305589 | 2018/10/13 | 17.97 | 1E+06 | 16.2  | 1.9  | 0.47 | 1.37 | 2.54  | 19.33 | 19.04 | 14.11 | 16.06 | 6.91  | 60.07  |
| HCM216  | male | 53 | intermediate | HBV | 281181 | 2018/1/6   | 86.78 | 2E+05 | 33.96 | 5.78 | 2.81 | 10.6 | 9.09  | 62.58 | 58.92 | 31.45 | 40.52 | 8.38  | 52.68  |
| HCEE217 | male | 51 | early        | HCV | 166652 | 2018/9/20  | 90.86 | 3E+05 | 45.99 | 7.85 | 3.64 | 15.2 | 12.47 | 74.35 | 68.88 | 44.17 | 45.6  | 8.33  | 33.88  |
| HCP218  | male | 65 | terminal     | HBV | 303974 | 2018/3/6   | 44.71 | 1E+05 | 8.75  | 1.48 | 1.5  | 3.38 | 2.93  | 20.84 | 19.34 | 12.52 | 16.79 | 10.17 | 57.06  |

|         |      |    |          |     |        |            |       |       |       |      |      |      |      |       |       |       |       |       |       |
|---------|------|----|----------|-----|--------|------------|-------|-------|-------|------|------|------|------|-------|-------|-------|-------|-------|-------|
| HCE219  | male | 72 | early    | HCV | 302108 | 2018/6/22  | NA    | NA    | NA    | NA   | NA   | NA   | NA   | NA    | NA    | NA    | NA    | NA    |       |
| HCEE228 | male | 61 | early    | HCV | 299246 | 2018/11/22 | NA    | NA    | NA    | NA   | NA   | NA   | NA   | NA    | NA    | NA    | NA    | NA    |       |
| HCL229  | male | 48 | terminal | HBV | 311218 | 2018/5/2   | 31.44 | 4E+05 | 23.17 | 3.11 | 1.68 | 4.38 | 3.22 | 34.61 | 32.08 | 19.89 | 23.06 | 16.31 | 30.36 |
| HCEE231 | male | 63 | early    | HCV | 310126 | 2018/3/29  | 17.97 | 1E+05 | 10.8  | 1.3  | 0.79 | 3.02 | 1.96 | 22.69 | 21.11 | 11.51 | 17.15 | 4.36  | 74.83 |

| MCP-1<br>(pg/mL) | IL-6<br>(pg/mL) | MIP-1alpha<br>(pg/mL) | MIP-1beta<br>(pg/mL) | sE-Selectin<br>(pg/mL) | sP-Selectin<br>(pg/mL) | TNF-alpha<br>(pg/mL) | REG3a<br>(pg/mL) | sCD14<br>(ng/mL) | PGRPs<br>(ng/mL) | LBP<br>(ng/mL) | Alanine aminotransferase<br>(ALT) | Aspartate aminotransferase<br>(AST) | Total bilirubin(TBIL) | Direct bilirubin (DBIL) | Gamma glutamyl transferase (GGT) | Alkaline phosphatase (ALP) | Cholinesterase (CHE) | Total serum bile acid (TBA) | Na+ | White Blood Cell (WBC) |
|------------------|-----------------|-----------------------|----------------------|------------------------|------------------------|----------------------|------------------|------------------|------------------|----------------|-----------------------------------|-------------------------------------|-----------------------|-------------------------|----------------------------------|----------------------------|----------------------|-----------------------------|-----|------------------------|
| 119.1            | 3.95            | 14.38                 | 42.83                | 22078                  | 2E+05                  | 60.98                | 10899            | 1681             | 17.9             | 2707           | 39.3                              | 45                                  | 17.6                  | 9.5                     | 76.6                             | 80                         | 3604                 | 33.1                        | 138 | 3.84                   |
| 72.43            | 10.7            | 6.72                  | 27.76                | 16343                  | 2E+05                  | 36.05                | 6844             | 997.7            | 13.76            | 2252           | 82.2                              | 112.1                               | 29.6                  | 14.9                    | 85.4                             | 146                        | 3171                 | 22.6                        | 137 | 6.15                   |
| 97.04            | 36.13           | 22.22                 | 25.48                | 17464                  | 7E+05                  | 61.97                | 5433             | 1382             | 14.15            | 3422           | 19.7                              | 26.7                                | 23.4                  | 10.8                    | 45.5                             | 103                        | 4083                 | 15.9                        | 137 | 3.76                   |
| 126.3            | 34.56           | 8.84                  | 24.4                 | 18126                  | 7E+05                  | 46.96                | 5284             | 741.7            | 14.59            | 1861           | 38                                | 24.2                                | 30.1                  | 10.5                    | 63.2                             | 84.4                       | 3931                 | 5.7                         | 136 | 4.47                   |
| 100.2            | 40.24           | 30.43                 | 31.89                | 11593                  | 2E+06                  | 84.21                | 11575            | 930.9            | 12.06            | 2076           | 31.7                              | 34.2                                | 9                     | 4.8                     | 217                              | 126                        | 6754                 | 3                           | 143 | 5.8                    |
| 92.28            | 32.45           | 11.13                 | 25.84                | 18968                  | 6E+05                  | 60.49                | 51001            | 757              | 16.72            | 1273           | 73.5                              | 57.7                                | 13.9                  | 6.4                     | 57.2                             | 41.4                       | 4964                 | 5.8                         | 140 | 5.26                   |
| 61.66            | 8.6             | 50.3                  | 11.58                | 36168                  | 5E+05                  | 70.36                | 14079            | 532.4            | 13.3             | 710.6          | 20.5                              | 42.4                                | 154.9                 | 141.3                   | 143.3                            | 93.2                       | 1330                 | 11                          | 128 | 12.3                   |
| 65.61            | 6.38            | 9.88                  | 31.75                | 18346                  | 1E+05                  | 60.32                | 10190            | 1274             | 19.57            | 1252           | 43.1                              | 32.8                                | 27.3                  | 14                      | 13.8                             | 97.4                       | 3571                 | 42.7                        | 141 | 1.88                   |
| 106.4            | 3.95            | 7.48                  | 30.36                | 16249                  | 19807                  | 22.88                | 14533            | 1100             | 20.82            | 1046           | 22                                | 53.2                                | 61.6                  | 52.3                    | 60.6                             | 94.9                       | 1294                 | 118                         | 141 | 3.38                   |
| 184.8            | 31.92           | 9.04                  | 22.44                | 15262                  | 45985                  | 34.32                | 14441            | 1333             | 5.229            | 2805           | 15.7                              | 31.5                                | 47.3                  | 34.9                    | 19                               | 60.9                       | 1943                 | 34.9                        | 137 | 1.98                   |
| 81.58            | 29.22           | 7.48                  | 30.57                | 17386                  | 4E+05                  | 31.89                | 6420             | 852.4            | 17.64            | 1680           | 16.2                              | 44                                  | 16.1                  | 8.8                     | 38.6                             | 77.4                       | 4142                 | 45.5                        | 140 | 4.2                    |
| 119.8            | 11.38           | 6.04                  | 39.17                | 21232                  | 5E+05                  | 48.31                | 4078             | 1222             | 22.32            | 2808           | 35.3                              | 36.5                                | 26.4                  | 15.9                    | 69.4                             | 121                        | 4093                 | 6.1                         | 145 | 4.16                   |
| 72.54            | <=0             | 6.66                  | 78.68                | 34470                  | 2E+06                  | 47.63                | 5428             | 1012             | 23.32            | 3328           | 80                                | 122.2                               | 43.7                  | 23.7                    | 59                               | 88.6                       | 2156                 | 86.6                        | 139 | 5.45                   |
| 209.9            | 20.75           | 4.35                  | 13.68                | 11749                  | 80530                  | 26.62                | 7377             | 1222             | 27.73            | 3917           | 16.5                              | 26.3                                | 14.6                  | 8.2                     | 24.4                             | 92.2                       | 3534                 | 9.4                         | 144 | 1.44                   |
| 158              | 17.15           | 6.21                  | 25.91                | 32960                  | 79632                  | 37.77                | 9781             | 757              | 20.04            | 1305           | 27.7                              | 25.5                                | 15.4                  | 7                       | 242.3                            | 65.4                       | 5524                 | 30.8                        | 140 | 3.68                   |
| 219.4            | 22.5            | 16.21                 | 54.45                | 23978                  | 3E+05                  | 57                   | 5213             | 975.8            | 23.96            | 2425           | 49.8                              | 104                                 | 18.1                  | 8.7                     | 22.1                             | 81.3                       | 4702                 | 33.7                        | 137 | 3.23                   |
| NA               | NA              | NA                    | NA                   | NA                     | NA                     | NA                   | NA               | NA               | NA               | NA             | 497.2                             | 96.1                                | 75.4                  | 54.7                    | 118.9                            | 116                        | 2653                 | 104                         | 136 | 7.23                   |
| 90.6             | 10.7            | 8.48                  | 18.72                | 20539                  | 2E+05                  | 57.67                | 7190             | 847.7            | 22.36            | 1141           | 18                                | 54.6                                | 90.5                  | 74.3                    | 162.7                            | 141                        | 1659                 | 131                         | 138 | 2.29                   |
| 88.41            | 11.71           | 9.04                  | 64.36                | 29825                  | 4E+05                  | 22.52                | 27910            | 2009             | 25.7             | 7141           | 22.4                              | 22                                  | 13.1                  | 6.9                     | 16.6                             | 58.6                       | 7672                 | 7.1                         | 142 | 4.49                   |
| 91.29            | 6.38            | 3.06                  | 14.16                | 17059                  | 37996                  | 37.08                | 5615             | 586.5            | 7.32             | 5643           | 23.2                              | 26.6                                | 25.9                  | 8.4                     | 22                               | 92                         | 1573                 | 19.1                        | 136 | 4.55                   |
| NA               | NA              | NA                    | NA                   | NA                     | NA                     | NA                   | NA               | NA               | NA               | NA             | 25.1                              | 36.5                                | 29.9                  | 15.6                    | 63.7                             | 97.3                       | 3651                 | 57.1                        | 142 | 2.68                   |
| 103.4            | 26.47           | 16.34                 | 93.31                | 15733                  | 2E+05                  | 36.05                | 37559            | 1966             | 18.23            | 6994           | 137.2                             | 852.4                               | 157.4                 | 152.9                   | 205.9                            | 208                        | 1259                 | 175                         | 120 | 5.57                   |
| 59.65            | 39.22           | 8.94                  | 24.4                 | 15313                  | 3E+05                  | 45.95                | 10925            | 1119             | 31.23            | 3866           | 12.8                              | 18.5                                | 31.5                  | 15.9                    | 47.1                             | 71                         | 3478                 | 8.3                         | 143 | 2.21                   |
| 61.55            | 17.45           | 13.94                 | 35.66                | 26705                  | 3E+05                  | 60.98                | 8426             | 1113             | 15.42            | 7138           | 670.3                             | 1083                                | 23.9                  | 14                      | 53.8                             | 119                        | 5367                 | 18.1                        | 135 | 4.11                   |
| 107              | 67.92           | 16.5                  | 34.84                | 18024                  | 5E+05                  | 71.67                | 3692             | 1157             | 21.26            | 1564           | 47.6                              | 59.4                                | 8.4                   | 5.1                     | 207.9                            | 64.4                       | ####                 | 45.9                        | 146 | 4.84                   |
| 65.72            | 34.04           | 15.03                 | 36.81                | 16775                  | 7E+05                  | 75.11                | 17775            | 2335             | 38.93            | 5177           | 33.5                              | 63                                  | 17.1                  | 8.4                     | 126.4                            | 126                        | 1703                 | 51                          | 138 | 2.41                   |
| 50.98            | 33.51           | 10.56                 | 26.41                | 14057                  | 3E+05                  | 64.94                | 26603            | 1954             | 17.92            | 8523           | 59.3                              | 84.3                                | 239.5                 | 156.9                   | 157.2                            | 146                        | 2790                 | 190                         | 135 | 5.49                   |
| 86.9             | 22.21           | 9.78                  | 20                   | 10985                  | 3E+05                  | 60.65                | 9861             | 537.8            | 7.717            | 5318           | 10.5                              | 21.3                                | 43                    | 9.8                     | 22                               | 53                         | 4422                 | 26.6                        | 140 | 2.3                    |
| NA               | NA              | NA                    | NA                   | NA                     | NA                     | NA                   | NA               | NA               | NA               | NA             | 32.1                              | 28.1                                | 17.9                  | 9.7                     | 57.3                             | 102                        | 4307                 | 6.2                         | 146 | 4.19                   |
| 82.2             | 35.61           | 10.85                 | 18.34                | 12936                  | 65538                  | 50.66                | 9091             | 815.7            | 7.848            | 2152           | 35.8                              | 59.5                                | 34.5                  | 18                      | 16.1                             | 102                        | 936                  | 42.1                        | 141 | 1.44                   |
| 67.31            | 14.96           | 9.39                  | 55.4                 | 25944                  | 8E+05                  | 30.67                | 4423             | 1227             | 7.114            | 2179           | 36.1                              | 29.4                                | 18.3                  | 8.5                     | 65.8                             | 99.3                       | 4254                 | 40.5                        | 141 | 3.82                   |
| 81.89            | 17.15           | 7.75                  | 18.19                | 12482                  | 41302                  | 29.79                | 40157            | 1007             | 10.04            | 4430           | 29.1                              | 31.3                                | 23.3                  | 10.9                    | 42.3                             | 78.1                       | 2585                 | 76.1                        | 133 | 1.31                   |

|       |       |       |       |       |       |       |       |       |       |       |       |       |       |       |       |      |      |      |     |      |
|-------|-------|-------|-------|-------|-------|-------|-------|-------|-------|-------|-------|-------|-------|-------|-------|------|------|------|-----|------|
| 53.27 | 12.71 | 10.46 | 19.25 | 12274 | 29970 | 28.39 | 52081 | 1162  | 18.96 | 5476  | 35.5  | 41.4  | 31.5  | 8.6   | 22    | 102  | 1573 | 19.1 | 133 | 2.67 |
| 50.98 | 16.53 | 10.08 | 35.05 | 13658 | 7E+05 | 43.91 | 10130 | 1292  | 19.46 | 3799  | 38.1  | 50.1  | 42.9  | 21.4  | 94.9  | 119  | 2880 | 34.7 | 142 | 3.34 |
| 119.4 | 67.92 | 18.59 | 38.5  | 11810 | 1E+06 | 442.7 | 3250  | 1207  | 20.06 | 3976  | 11.1  | 17.6  | 14.5  | 5     | 15.9  | 95.8 | 7962 | 2    | 143 | 4.15 |
| 92.67 | 81.27 | 21.07 | 36.34 | 11986 | 3E+05 | 75.92 | 16217 | 1094  | 9.055 | 6523  | 36.2  | 51.4  | 42.8  | 13.6  | 136.7 | 158  | 3104 | 37.4 | 139 | 4.83 |
| 82.51 | 41.76 | 12.06 | 21.7  | 10461 | 7E+05 | 64.61 | 3755  | 791.7 | 15.6  | 1269  | 48.9  | 149.5 | 52.4  | 36.4  | 275.2 | 249  | 1473 | 71.5 | 130 | 7.09 |
| 121.2 | 17.15 | 15.41 | 34.77 | 15785 | 2E+06 | 84.21 | 3205  | 948.1 | 11.93 | 5038  | 22.9  | 17.5  | 11.7  | 5.5   | 48.3  | 80.5 | 7158 | 12.3 | 141 | 7.05 |
| 132.9 | 27.85 | 6.77  | 19.62 | 18377 | 3E+05 | 32.94 | 4622  | 726.4 | 12.88 | 4984  | 36.2  | 36.9  | 19.9  | 8.4   | 50.5  | 72.8 | 3529 | 27.1 | 136 | 3.2  |
| NA    | NA    | NA    | NA    | NA    | NA    | NA    | NA    | NA    | NA    | NA    | 30.1  | 24.8  | 18.5  | 3.7   | 38    | 80   | 2456 | 38.8 | 142 | 4.29 |
| 23.76 | 52.07 | 9.29  | 54.58 | 21943 | 8E+05 | 45.61 | 16414 | 2900  | 25.76 | 10491 | 56.6  | 138.1 | 37.3  | 27.1  | 572.9 | 434  | 2359 | 31.1 | 140 | 5.25 |
| 53.27 | 42.01 | 5.4   | 17.2  | 14386 | 41047 | 39.83 | 10388 | 908.8 | 32.09 | 4618  | 28.9  | 67.3  | 68.2  | 51.2  | 159.1 | 191  | 1203 | 55   | 134 | 2.91 |
| 56.75 | 3.95  | 9.69  | 31.96 | 16872 | 2E+05 | 54.84 | 7869  | 655.6 | 31.73 | 1999  | 30.2  | 31.3  | 7.9   | 5.1   | 65.7  | 80.9 | 4065 | 7.1  | 139 | 6.12 |
| 42.39 | 33.25 | 5.57  | 21.33 | 11854 | 1E+06 | 50.99 | 39805 | 1433  | 17.86 | 12276 | 9.3   | 15    | 9.8   | 6     | 30.5  | 51.5 | 3443 | 19.9 | 143 | 12   |
| 134.1 | 22.5  | 5.4   | 22.29 | 17394 | 53920 | 40.17 | 16762 | 1914  | 9.8   | 7864  | 63.2  | 59.1  | 18.3  | 11.1  | 181.1 | 137  | 5336 | 17.3 | 143 | 6.72 |
| NA    | NA    | NA    | NA    | NA    | NA    | NA    | NA    | NA    | NA    | NA    | 28.8  | 34.8  | 11.1  | 7.2   | 153.5 | 139  | 5954 | 2.5  | 139 | 5.46 |
| 170.7 | 68.15 | 18.43 | 42.03 | 8500  | 6E+05 | 93.91 | 9067  | 1785  | 18.54 | 771   | 26    | 28.7  | 15.7  | 5.9   | 37    | 59.3 | 8229 | 6.9  | 140 | 7.2  |
| 70.89 | 8.6   | 8.48  | 16.81 | 3147  | 17523 | 19.62 | 7454  | 1349  | 13.32 | 7748  | 25    | 22.4  | 13.6  | 6.1   | 46.7  | 79.3 | 5028 | 26.7 | 140 | 4.6  |
| 79.91 | 38.71 | 11.04 | 26.41 | 23627 | 9E+05 | 66.59 | 5663  | 1460  | 20.78 | 3618  | 34.7  | 71.3  | 29    | 15.6  | 150.8 | 113  | 2281 | 92.9 | 136 | 4.21 |
| 103.5 | 23.65 | 8.89  | 44.28 | 21704 | 3E+06 | 59.33 | 7489  | 2181  | 14.81 | 4499  | 92.1  | 120.9 | 280.3 | 205.2 | 562.8 | 339  | 3295 | 135  | 136 | 7.14 |
| 81.79 | 13.36 | 10.27 | 27.2  | 20800 | 1E+06 | 52.67 | 3687  | 956.8 | 6.304 | 863.9 | 121.6 | 154.1 | 17.4  | 8     | 39.3  | 117  | 3105 | 50.3 | 137 | 2.81 |
| 93.45 | 15.28 | 4.66  | 26.13 | 14527 | 2E+05 | 42.56 | 5925  | 1254  | 8.258 | 2124  | 131.9 | 113.8 | 40.2  | 24.5  | 85.6  | 114  | 1842 | 68.4 | 133 | 2.7  |
| 115.7 | <=0   | 1.97  | 11.66 | 16116 | 17763 | 28.21 | 4222  | 1015  | 5.564 | 989.5 | 40.7  | 46.2  | 14.2  | 8.2   | 123.8 | 113  | 1894 | 19.3 | 139 | 1.09 |
| 83.03 | 7.88  | 3.75  | 12.39 | 12152 | 51499 | 26.27 | 15949 | 1195  | 7.897 | 399.5 | 20.5  | 36.7  | 14.2  | 10.7  | 178.5 | 171  | 2061 | 27.5 | 134 | 1.84 |
| 117.8 | 4.38  | 17.33 | 42.43 | 17878 | 42964 | 51.33 | 4221  | 1030  | 9.989 | 1478  | 41.9  | 54.8  | 470.6 | 343.5 | 170.7 | 231  | 4834 | 167  | 136 | 3.62 |
| 59.41 | 2.13  | 3.48  | 38.16 | 20337 | 6E+05 | 41.87 | 3728  | 1212  | 12.6  | 2780  | 40.9  | 45.2  | 70.6  | 51.9  | 63.6  | 115  | 3468 | 207  | 136 | 1.47 |
| 72.86 | 28.4  | 16.75 | 32.44 | 14086 | 8E+05 | 67.74 | 52797 | 997.8 | 18.51 | 980.7 | 35.4  | 36.1  | 16.7  | 7.7   | 228.7 | 133  | 2928 | 13.7 | 137 | 4.86 |
| 66.29 | 29.49 | 9.09  | 20.74 | 14083 | 5E+05 | 55.51 | 7630  | 1356  | 10.39 | 1429  | 23.3  | 23.5  | 50.1  | 17.2  | 38.4  | 62.8 | 8097 | 18.8 | 140 | 4.97 |
| 88    | 11.38 | 8.38  | 30.15 | 14075 | 1E+05 | 37.94 | 8072  | 1411  | 20.93 | 2073  | 9.4   | 23    | 56.5  | 24.2  | 32.4  | 78.6 | 2677 | 4.2  | 134 | 4.53 |
| 127.3 | 9.31  | <=0   | 13.2  | 11253 | 46824 | 21.26 | 8038  | 718.1 | 6.773 | 2852  | 29.2  | 37.7  | 34.2  | 14.3  | 38.4  | 79.5 | 3298 | 29.8 | 138 | 1.49 |
| 83.74 | 13.04 | 9.88  | 63.61 | 16692 | 5E+05 | 74.94 | 7578  | 1169  | 16.81 | 3212  | 22.6  | 32.6  | 33.8  | 13.3  | 30.2  | 110  | 3252 | 97.7 | 136 | 1.22 |
| 48.9  | 44.26 | 9.78  | 20.3  | 9658  | 5E+05 | 62.14 | 2651  | 1329  | 17.88 | 5259  | 16.5  | 25    | 12.5  | 4.1   | 21.2  | 57.3 | 8468 | 5.6  | 143 | 3.63 |
| 46.78 | 36.39 | 18.22 | 28.96 | 19940 | 9E+05 | 55.84 | NA    | 1297  | 36.18 | 4470  | 22.4  | 35.9  | 49.5  | 39.2  | 143.3 | 169  | 1344 | 20.2 | 133 | 6.14 |
| 36.27 | 18.36 | 11.5  | 33.06 | 8255  | 1E+06 | 63.3  | NA    | 949.8 | 11.07 | 5047  | 74.3  | 48.8  | 39.4  | 14    | 50.5  | 54.2 | 3409 | 6.9  | 142 | 3.69 |
| 71    | <=0   | 7.85  | 58.33 | 23280 | 37111 | 37.08 | 18956 | 769.1 | 17.74 | 2676  | 42.4  | 63.3  | 64.4  | 34.5  | 36    | 82.2 | 1356 | 105  | 142 | 4.23 |
| NA    | NA    | NA    | NA    | NA    | NA    | NA    | NA    | NA    | NA    | NA    | 24.9  | 63.6  | 43.4  | 27.9  | 55.1  | 83.8 | 954  | 133  | 132 | 5.36 |
| 269.5 | 4.79  | 11.32 | 25.91 | 32054 | 6E+06 | 79.34 | 3532  | 777.7 | 4.947 | 2190  | 60.3  | 131.1 | 188.2 | 135.1 | 758.6 | 451  | 4713 | 71.8 | 139 | 5.68 |
| 90.8  | 60.34 | 14.12 | 43.09 | 12206 | 2E+05 | 75.11 | 6928  | 1625  | 17.23 | 5512  | 60.1  | 57.3  | 20.2  | 10.8  | 114.4 | 111  | 3001 | 18.6 | 138 | 6.05 |
| 86.29 | 75.33 | 16.83 | 33.13 | 12743 | 96946 | 68.73 | 7205  | 1147  | 10.19 | 2287  | 11.3  | 21.4  | 27.1  | 12.3  | 373.8 | 52.2 | 3802 | 16.6 | 136 | 7.66 |
| 91.88 | 24.22 | 2.98  | 22.07 | 7490  | 2E+05 | 26.98 | NA    | 2139  | 16.93 | 710.7 | 48.6  | 127.2 | 36.2  | 21.9  | 173.1 | 464  | 1826 | 25.5 | 138 | 4.28 |

|       |       |       |      |       |       |       |       |       |       |       |      |       |      |      |       |      |      |      |      |      |
|-------|-------|-------|------|-------|-------|-------|-------|-------|-------|-------|------|-------|------|------|-------|------|------|------|------|------|
| NA    | NA    | NA    | NA   | NA    | NA    | NA    | NA    | NA    | NA    | NA    | 15.7 | 31.5  | 47.3 | 34.9 | 19    | 60.9 | 1943 | 34.9 | 137  | 1.98 |
| NA    | NA    | NA    | NA   | NA    | NA    | NA    | NA    | NA    | NA    | NA    | 19.8 | 27.8  | 12.4 | 5    | 22.5  | 100  | 3947 | 36.9 | 1337 | 1.91 |
| 58.45 | 56.83 | 13.68 | 28.4 | 17430 | 2E+06 | 76.9  | 27792 | 2480  | 38.42 | 13006 | 45.4 | 108.8 | 72.6 | 48.5 | 485.3 | 466  | 1275 | 40.7 | 128  | 10.2 |
| 124.1 | 18.36 | 5.28  | 19.7 | 23973 | 4E+05 | 31.02 | 13163 | 643.2 | 7.964 | 3775  | 38.6 | 30.5  | 9.5  | 4.1  | 38    | 84.8 | 4152 | 4.5  | 142  | 3.13 |

| Hematoglobin (HGB) | Platelets (PLT) | Prothrombin Time (PT) | Prothrombin activity (PTA) | Prothrombin time international standardized ratio (INR) | Creatinine (CRE) | Child grading of liver function | Model for end-stage liver disease (MELD) | Firmicutes phylum | Bacteroidetes phylum | Actinobacteria phylum | Fusobacteria phylum | Tenericutes phylum | Enterococcaeae family | Lachnospiraceae family | Bifidobacteriaceae family | Enterobacteriaceae family | Peptostreptococcaeae family | unidentified_Clostridiales family | ratio of Enterococcaeae and Bifidobacteriaceae |
|--------------------|-----------------|-----------------------|----------------------------|---------------------------------------------------------|------------------|---------------------------------|------------------------------------------|-------------------|----------------------|-----------------------|---------------------|--------------------|-----------------------|------------------------|---------------------------|---------------------------|-----------------------------|-----------------------------------|------------------------------------------------|
| 134                | 96              | 12.1                  | 89                         | 1.08                                                    | 52.4             | B                               | 56.165                                   | 0.435             | 0.528                | 0.029                 | 2E-04               | 1E-03              | 0.005                 | 0.11                   | 0.019                     | 0.003                     | 0.0469                      | 0.0355                            | 0.385844                                       |
| 115                | 101             | 14.7                  | 65                         | 1.3                                                     | 70               | B                               | 62.998                                   | 0.414             | 0.489                | 0.072                 | 0.001               | 2E-04              | 0.025                 | 0.171                  | 0.066                     | 0.013                     | 0.012                       | 0.0044                            | 0.613885                                       |
| 123                | 79              | 11.6                  | 96                         | 1.03                                                    | 44.2             | A                               | 55.083                                   | 0.745             | 0.146                | 0.069                 | 1E-04               | 3E-05              | 0.03                  | 0.198                  | 0.058                     | 0.027                     | 0.0285                      | 0.0086                            | 0.726126                                       |
| 128                | 94              | 11.6                  | 94                         | 1.03                                                    | 51.5             | A                               | 57.507                                   | 0.301             | 0.481                | 0.042                 | 4E-04               | 0.004              | 0.002                 | 0.167                  | 0.035                     | 0.167                     | 0.0047                      | 0.0049                            | 0.098449                                       |
| 155                | 233             | 11.1                  | 101                        | 233                                                     | 61.5             | A                               | 115.34                                   | 0.827             | 0.103                | 0.014                 | 0.001               | 2E-04              | 7E-04                 | 0.636                  | 0.007                     | 0.052                     | 0.003                       | 0.0045                            | 0.133727                                       |
| 153                | 119             | 11.3                  | 98                         | 1.01                                                    | 64.4             | A                               | 56.498                                   | 0.833             | 0.094                | 0.073                 | 0                   | 6E-05              | 2E-04                 | 0.421                  | 0.066                     | 2E-04                     | 0.0085                      | 0.017                             | 0.007822                                       |
| 76                 | 44              | 17.3                  | 52                         | 1.52                                                    | 479.3            | C                               | 89.506                                   | 0.951             | 0.014                | 0.006                 | 2E-04               | 0                  | 0.662                 | 0.051                  | 0.004                     | 0.019                     | 0.0059                      | 0.0025                            | 11.43166                                       |
| 129                | 50              | 14.1                  | 70                         | 1.25                                                    | 78.5             | B                               | 63.351                                   | 0.942             | 0.013                | 0.024                 | 1E-04               | 1E-04              | 0.131                 | 0.259                  | 0.019                     | 0.013                     | 0.016                       | 0.0042                            | 2.488594                                       |
| 99                 | 39              | 17.3                  | 53                         | 1.52                                                    | 62.2             | C                               | 66.399                                   | 0.902             | 0.046                | 0.026                 | 0.001               | 3E-04              | 0.036                 | 0.189                  | 0.014                     | 0.01                      | 0.0184                      | 0.0252                            | 1.74618                                        |
| 109                | 50              | 15.6                  | 63                         | 1.39                                                    | 75.8             | B                               | 66.293                                   | 0.781             | 0.118                | 0.027                 | 0                   | 3E-04              | 0.002                 | 0.355                  | 0.011                     | 0.052                     | 0.0682                      | 0.0708                            | 0.184629                                       |
| 139                | 70              | 12.1                  | 89                         | 1.08                                                    | 66               | A                               | 58.042                                   | 0.83              | 0.049                | 0.029                 | 3E-04               | 0                  | 8E-04                 | 0.22                   | 0.016                     | 0.078                     | 0.0074                      | 0.0019                            | 0.079938                                       |
| 164                | 110             | 12.7                  | 82                         | 1.13                                                    | 63.5             | A                               | 60.058                                   | 0.592             | 0.269                | 0.054                 | 0                   | 3E-04              | 0.018                 | 0.233                  | 0.039                     | 0.057                     | 0.0163                      | 0.0149                            | 0.65467                                        |
| 140                | 57              | 13.4                  | 76                         | 1.19                                                    | 54.2             | B                               | 61.032                                   | 0.523             | 0.056                | 0.024                 | 1E-04               | 2E-04              | 0.028                 | 0.208                  | 0.016                     | 0.059                     | 0.0164                      | 0.0305                            | 1.383806                                       |
| 102                | 82              | 11.7                  | 93                         | 1.04                                                    | 62.9             | A                               | 56.786                                   | 0.405             | 0.159                | 0.031                 | 2E-04               | 8E-04              | 0.01                  | 0.197                  | 0.017                     | 0.389                     | 0.0371                      | 0.0153                            | 0.681848                                       |
| 117                | 88              | 11.9                  | 91                         | 1.06                                                    | 74.3             | A                               | 58.801                                   | 0.495             | 0.406                | 0.019                 | 0                   | 6E-05              | 4E-04                 | 0.271                  | 0.012                     | 0.013                     | 0.0205                      | 0.0571                            | 0.043324                                       |
| 133                | 68              | 12.7                  | 83                         | 1.13                                                    | 66.7             | A                               | 59.095                                   | 0.751             | 0.109                | 0.077                 | 8E-04               | 2E-04              | 0.004                 | 0.405                  | 0.017                     | 0.057                     | 0.0354                      | 0.0162                            | 0.312766                                       |
| 130                | 55              | 15                    | 66                         | 1.34                                                    | 67.1             | B                               | 66.484                                   | 0.852             | 0.064                | 0.028                 | 5E-04               | 0                  | 0.003                 | 0.513                  | 0.02                      | 0.048                     | 0.0157                      | 0.0038                            | 0.258038                                       |
| 115                | 57              | 17.2                  | 54                         | 1.53                                                    | 61.7             | B                               | 67.857                                   | 0.677             | 0.089                | 0.208                 | 6E-04               | 0.001              | 0.004                 | 0.337                  | 0.141                     | 0.016                     | 0.0584                      | 0.0321                            | 0.119725                                       |
| 159                | 123             | 13.6                  | 75                         | 1.21                                                    | 67.6             | A                               | 58.762                                   | 0.199             | 0.015                | 0.013                 | 0.644               | 3E-04              | 0.02                  | 0.056                  | 0.007                     | 0.055                     | 0.0081                      | 0.0072                            | 2.113139                                       |
| 79                 | 149             | 13.4                  | 76                         | 1.19                                                    | 68.8             | B                               | 61.334                                   | 0.884             | 0.007                | 0.024                 | 0.011               | 4E-04              | 0.503                 | 0.07                   | 0.014                     | 0.054                     | 0.0109                      | 0.0198                            | 4.500879                                       |
| 142                | 24              | 14.9                  | 67                         | 1.33                                                    | 50.3             | A                               | 60.119                                   | 0.53              | 0.006                | 0.008                 | 0.011               | 3E-04              | 0.076                 | 0.053                  | 0.003                     | 0.434                     | 0.0069                      | 0.0092                            | 7.555966                                       |
| 88                 | 201             | 14                    | 72                         | 1.25                                                    | 118.7            | C                               | 73.978                                   | 0.931             | 0.002                | 0.009                 | 0.008               | 3E-04              | 0.749                 | 0.058                  | 0.004                     | 0.045                     | 0.0205                      | 0.0135                            | 12.44338                                       |
| 109                | 67              | 11.6                  | 95                         | 1.04                                                    | 71               | A                               | 60.871                                   | 0.706             | 0.025                | 0.114                 | 0.016               | 0.002              | 0.028                 | 0.16                   | 0.053                     | 0.029                     | 0.0769                      | 0.1954                            | 0.718565                                       |
| 110                | 65              | 13.4                  | 77                         | 1.19                                                    | 80.7             | A                               | 62.56                                    | 0.822             | 0.021                | 0.061                 | 0.015               | 0.014              | 0.043                 | 0.393                  | 0.016                     | 0.043                     | 0.062                       | 0.0421                            | 1.753045                                       |
| 160                | 156             | 10.3                  | 115                        | 0.92                                                    | 86.4             | A                               | 56.36                                    | 0.782             | 0.104                | 0.035                 | 4E-04               | 6E-04              | 0.023                 | 0.228                  | 0.022                     | 0.071                     | 0.0059                      | 0.0074                            | 1.016017                                       |
| 103                | 53              | 11.8                  | 92                         | 1.05                                                    | 95.7             | A                               | 61.523                                   | 0.988             | 0.004                | 0.002                 | 3E-05               | 3E-05              | 0.881                 | 0.038                  | 8E-04                     | 0.003                     | 0.0051                      | 0.0093                            | 56.15333                                       |
| 102                | 86              | 11.3                  | 99                         | 1.01                                                    | 54.3             | C                               | 65.677                                   | 0.602             | 0.389                | 0.006                 | 6E-05               | 7E-04              | 0.01                  | 0.348                  | 0.002                     | 9E-04                     | 0.0374                      | 0.0149                            | 3.909689                                       |
| 122                | 65              | 14.7                  | 67                         | 1.31                                                    | 83.9             | B                               | 66.241                                   | 0.5               | 0.259                | 0.023                 | 9E-04               | 0.004              | 0.011                 | 0.188                  | 0.011                     | 0.212                     | 0.027                       | 0.0159                            | 1.021036                                       |
| 156                | 112             | 12.1                  | 89                         | 1.08                                                    | 56               | A                               | 56.868                                   | 0.868             | 0.087                | 0.032                 | 0.001               | 0.006              | 0.004                 | 0.436                  | 0.015                     | 0.003                     | 0.0175                      | 0.0118                            | 0.347699                                       |
| 106                | 40              | 14                    | 69                         | 1.27                                                    | 57               | B                               | 61.346                                   | 0.565             | 0.21                 | 0.005                 | 0.002               | 0.002              | 0.016                 | 0.302                  | 0.002                     | 0.199                     | 0.0186                      | 0.0684                            | 5.302609                                       |
| 135                | 97              | 14.2                  | 70                         | 1.26                                                    | 80.2             | A                               | 62.126                                   | 0.823             | 0.041                | 0.052                 | 0.002               | 0.063              | 0.003                 | 0.429                  | 0.003                     | 0.013                     | 0.025                       | 0.0295                            | 0.761774                                       |
| 74                 | 17              | 16.4                  | 59                         | 1.46                                                    | 55.8             | B                               | 61.212                                   | 0.866             | 0.1                  | 0.011                 | 0.002               | 3E-04              | 0.032                 | 0.144                  | 0.004                     | 0.018                     | 0.0184                      | 0.0374                            | 3.956727                                       |

|      |     |       |    |      |       |   |        |       |       |       |       |       |       |       |       |       |        |        |          |
|------|-----|-------|----|------|-------|---|--------|-------|-------|-------|-------|-------|-------|-------|-------|-------|--------|--------|----------|
| 84   | 18  | 15.9  | 57 | 1.42 | 57    | B | 62.251 | 0.272 | 0.62  | 0.002 | 3E-05 | 0     | 3E-04 | 0.023 | 0.002 | 0.066 | 0.0008 | 0.0006 | 3.956727 |
| 125  | 35  | 14.3  | 70 | 1.28 | 77.4  | B | 65.199 | 0.84  | 0.113 | 0.003 | 0.003 | 3E-04 | 0.008 | 0.194 | 2E-04 | 0.036 | 0.0062 | 0.0083 | 30.3405  |
| 151  | 153 | 12.4  | 86 | 1.11 | 67.4  | A | 58.153 | 0.753 | 0.232 | 0.012 | 0     | 0     | 1E-04 | 0.255 | 0.008 | 0.003 | 0.0103 | 0.0167 | 0.016768 |
| 129  | 112 | 12.2  | 88 | 1.09 | 74.1  | A | 62.972 | 0.842 | 0.062 | 0.062 | 0.002 | 0.005 | 0.007 | 0.356 | 0.001 | 0.023 | 0.0149 | 0.1198 | 4.801387 |
| 120  | 107 | 12.9  | 81 | 1.15 | 97.7  | C | 66.995 | 0.682 | 0.307 | 0.005 | 2E-04 | 2E-04 | 0.009 | 0.323 | 4E-04 | 0.002 | 0.0188 | 0.0244 | 18.97477 |
| 154  | 144 | 11.4  | 97 | 1.02 | 66.4  | A | 56.247 | 0.857 | 0.086 | 0.02  | 0.007 | 0.005 | 0.027 | 0.287 | 0.002 | 0.019 | 0.0182 | 0.0237 | 6.199251 |
| 99   | 77  | 12.7  | 83 | 1.13 | 47.5  | A | 56.197 | 0.877 | 0.101 | 0.01  | 8E-04 | 5E-04 | 0.012 | 0.447 | 0.002 | 0.009 | 0.0982 | 0.0831 | 3.857202 |
| 170  | 139 | 13.6  | 75 | 1.21 | 72.5  | A | 60.745 | 0.372 | 0.037 | 0.006 | 0.283 | 0.003 | 0.008 | 0.219 | 0.001 | 0.297 | 0.0092 | 0.0139 | 4.18156  |
| 134  | 183 | 12.2  | 88 | 1.09 | 55.9  | C | 59.744 | 0.459 | 0.337 | 0.007 | 0.03  | 0.003 | 0.005 | 0.176 | 0.002 | 0.126 | 0.0212 | 0.0128 | 2.01709  |
| 88   | 44  | 12.9  | 81 | 1.15 | 84.4  | C | 66.592 | 0.82  | 0.043 | 0.007 | 0.035 | 0.001 | 0.035 | 0.084 | 0.003 | 0.087 | 0.0178 | 0.0139 | 6.567404 |
| 140  | 148 | 11.5  | 96 | 1.03 | 48    | A | 51.749 | 0.767 | 0.213 | 0.009 | 6E-05 | 4E-04 | 0.217 | 0.135 | 0.003 | 0.006 | 0.0278 | 0.0248 | 11.65829 |
| 83   | 230 | 18.8  | 48 | 1.67 | 131.6 | B | 67.662 | 0.768 | 0.207 | 0.005 | 6E-04 | 0.001 | 0.035 | 0.273 | 0.002 | 0.008 | 0.0048 | 0.0063 | 10.80537 |
| 114  | 250 | 13.9  | 72 | 1.24 | 56.2  | A | 58.533 | 0.962 | 0.02  | 0.006 | 3E-05 | 3E-04 | 0.043 | 0.144 | 0.001 | 0.006 | 0.0194 | 0.0117 | 14.92953 |
| 123  | 420 | 12.3  | 86 | 1.1  | 49.6  | A | 54.092 | 0.106 | 0.863 | 0.002 | 1E-04 | 0     | 4E-04 | 0.012 | 0.002 | 0.02  | 0.0012 | 0.0008 | 0.207023 |
| 164  | 120 | 12    | 90 | 1.07 | 77.6  | A | 59.397 | 0.933 | 0.026 | 0.009 | 9E-04 | 0.002 | 0.008 | 0.467 | 0.003 | 0.018 | 0.0114 | 0.0231 | 2.123455 |
| 153  | 51  | 12.6  | 83 | 1.12 | 60.6  | A | 56.989 | 0.166 | 0.785 | 0.002 | 0.001 | 0     | 2E-04 | 0.035 | 0.002 | 0.006 | 0.0024 | 0.0538 | 0.082844 |
| 150  | 99  | 13.3  | 76 | 1.19 | 41.6  | B | 56.934 | 0.115 | 0.798 | 0.001 | 3E-04 | 0     | 2E-04 | 0.068 | 0.001 | 0.076 | 0.002  | 0.0026 | 0.128762 |
| 137  | 233 | 12.5  | 84 | 1.12 | 52.7  | B | 67.146 | 0.561 | 0.153 | 4E-04 | 0.032 | 0     | 6E-05 | 0.046 | 6E-05 | 0.095 | 0.0003 | 0.0014 | 1        |
| 131  | 69  | 15.7  | 60 | 1.4  | 38.6  | A | 56.094 | 0.095 | 0.881 | 0.001 | 6E-05 | 0     | 2E-04 | 0.042 | 1E-03 | 0.013 | 0.0008 | 0.0019 | 0.201075 |
| 63   | 45  | 15.9  | 60 | 1.41 | 51.4  | B | 62.105 | 0.212 | 0.66  | 0.012 | 0.002 | 3E-05 | 4E-04 | 0.096 | 0.008 | 0.092 | 0.0032 | 0.0208 | 0.07153  |
| 41   | 35  | 13.4  | 77 | 1.2  | 62.3  | B | 58.191 | 0.44  | 0.481 | 0.014 | 0.005 | 0     | 4E-04 | 0.128 | 0.005 | 0.021 | 0.0038 | 0.0022 | 0.086341 |
| 67   | 57  | 12.5  | 82 | 1.12 | 68.7  | B | 58.357 | 0.106 | 0.866 | 1E-03 | 0.002 | 0     | 0     | 0.033 | 3E-04 | 0.007 | 0.0006 | 0.0055 | 0        |
| 135  | 137 | 14    | 72 | 1.25 | 65.1  | B | 72.373 | 0.167 | 0.751 | 0.003 | 7E-04 | 6E-05 | 1E-04 | 0.069 | 0.001 | 0.019 | 0.0005 | 0.0021 | 0.092511 |
| 112  | 43  | 17.6  | 49 | 1.58 | 31.2  | B | 60.728 | 0.695 | 0.23  | 0.017 | 5E-04 | 0.002 | 0.003 | 0.216 | 0.016 | 0.048 | 0.0016 | 0.0037 | 0.250847 |
| 132  | 119 | 12.4  | 84 | 1.11 | 47    | B | 55.229 | 0.075 | 0.417 | 0.002 | 4E-04 | 0.002 | 3E-05 | 0.014 | 0.001 | 0.486 | 0.0003 | 0.0004 | 0.028552 |
| 166  | 110 | 12.2  | 88 | 1.09 | 78.5  | A | 64.124 | 0.047 | 0.866 | 0.001 | 0.003 | 0     | 3E-04 | 0.028 | 0.001 | 0.08  | 0.0004 | 0.0008 | 0.244757 |
| 108  | 45  | 15.3  | 60 | 1.37 | 71.3  | B | 66.218 | 0.304 | 0.319 | 0.011 | 6E-05 | 0     | 5E-04 | 0.092 | 0.004 | 0.061 | 0.0014 | 0.0005 | 0.129768 |
| 107  | 82  | 16    | 59 | 1.42 | 49.5  | A | 61.209 | 0.182 | 0.771 | 9E-04 | 0.004 | 0     | 1E-03 | 0.039 | 4E-04 | 0.009 | 0.0005 | 0.0011 | 2.249041 |
| 117  | 25  | 15.3  | 60 | 1.37 | 53.3  | B | 61.473 | 0.115 | 0.864 | 5E-04 | 6E-05 | 0     | 2E-04 | 0.061 | 5E-04 | 0.001 | 0.0175 | 0.0076 | 0.317899 |
| 148  | 120 | 12.2  | 88 | 1.09 | 57.9  | A | 55.927 | 0.154 | 0.818 | 0.001 | 4E-04 | 1E-04 | 3E-05 | 0.115 | 7E-04 | 0.003 | 0.0023 | 0.0012 | 0.046962 |
| 79   | 96  | 14.8  | 65 | 1.32 | 47.3  | B | 61.359 | 0.082 | 0.587 | 0.015 | 0.278 | 2E-04 | 1E-03 | 0.026 | 0.013 | 0.037 | 0.0037 | 0.001  | 0.113426 |
| 119  | 52  | 17.3  | 50 | 1.54 | 58.2  | B | 64.21  | 0.463 | 0.325 | 0.002 | 7E-04 | 2E-04 | 4E-04 | 0.376 | 0.001 | 0.162 | 0.0002 | 0.0013 | 0.309163 |
| 106  | 48  | 15.5  | 62 | 1.38 | 45.4  | C | 62.464 | 0.103 | 0.649 | 1E-04 | 0.006 | 0     | 6E-05 | 0.066 | 3E-05 | 0.231 | 0.0004 | 0.0035 | 1.996814 |
| 100  | 58  | 16.2  | 55 | 1.45 | 60.2  | C | 64.227 | 0.088 | 0.704 | 0.006 | 4E-04 | 0     | 3E-05 | 0.022 | 3E-04 | 0.155 | 0.0012 | 0.0003 | 0.126392 |
| 3.81 | 108 | 133.7 | 75 | 1.22 | 61.4  | B | 68.057 | 0.243 | 0.74  | 0.001 | 7E-04 | 3E-04 | 0     | 0.027 | 1E-04 | 0.01  | 6E-05  | 0.0002 | 0        |
| 139  | 93  | 13.3  | 77 | 1.19 | 53.7  | A | 58.011 | 0.111 | 0.857 | 0.002 | 9E-04 | 1E-04 | 6E-05 | 0.031 | 0.002 | 0.003 | 0.001  | 0.0011 | 0.040723 |
| 138  | 98  | 14.7  | 68 | 1.31 | 55.2  | A | 60.468 | 0.367 | 0.526 | 0.019 | 0.022 | 0     | 6E-04 | 0.31  | 0.019 | 0.052 | 0.0055 | 0.0015 | 0.05566  |
| 104  | 118 | 11.9  | 91 | 1.06 | 86.3  | B | 63.486 | 0.414 | 0.046 | 0.003 | 0.001 | 0     | 1E-04 | 0.125 | 3E-04 | 0.525 | 0.0274 | 0.0171 | 0.403789 |



|     |     |      |     |      |      |   |        |       |       |       |       |   |       |       |       |       |        |        |          |
|-----|-----|------|-----|------|------|---|--------|-------|-------|-------|-------|---|-------|-------|-------|-------|--------|--------|----------|
| 109 | 50  | 15.6 | 63  | 1.39 | 75.8 | B | 66.293 | 0.473 | 0.028 | 0.493 | 0.001 | 0 | 0.02  | 0.011 | 0.492 | 0.002 | 0.0844 | 0.0221 | 0.277076 |
| 84  | 78  | 12.4 | 86  | 1.11 | 44.5 | A | 53.573 | 0.314 | 0.645 | 5E-04 | 5E-04 | 0 | 2E-04 | 0.206 | 2E-04 | 0.029 | 0.0017 | 0.0009 | 0.834649 |
| 136 | 232 | 14.6 | 66  | 1.3  | 52.8 | C | 63.7   | 0.107 | 0.873 | 4E-04 | 0     | 0 | 0.002 | 1E-03 | 6E-05 | 1E-04 | 0.0018 | 6E-05  | 25.83731 |
| 132 | 87  | 11.1 | 101 | 0.99 | 65   | A | 54.916 | 0.109 | 0.47  | 3E-04 | 0.001 | 0 | 6E-05 | 0.016 | 1E-04 | 0.396 | 0.0004 | 0.0001 | 0.50159  |
